# Supplementary material for: A cautionary note on recall vaccination in ex-COVID-19 subjects
Source: bioRxiv or medRxiv preprint supplement (doi:10.1101/2021.02.01.21250923), 2021-02-06
Supplement: Supplementary file [file media-1.pdf]

**Supplementary Table 1:** Multivariate linear regression coefficients and exponentiated coefficients for all the variables analyzed.

|                            | Coeff  | 5%    | 95%    | Exponentiated Coefficients | 5%    | 95%   |   |
|----------------------------|--------|-------|--------|----------------------------|-------|-------|---|
| Constant                   | 2.98   | 2.78  | 3.25   | 19.65                      | 16.05 | 25.67 | * |
| IgG levels pre VAX         | 0.87   | 0.59  | 1.13   | 2.38                       | 1.80  | 3.10  | * |
| Fever                      | 0.16   | -0.28 | 0.60   | 1.18                       | 0.76  | 1.82  |   |
| Low-grade Fever            | -0.06  | -0.45 | 0.22   | 0.94                       | 0.64  | 1.24  |   |
| Headache                   | -0.03  | -0.35 | 0.28   | 0.97                       | 0.70  | 1.32  |   |
| Cough                      | 0.04   | -0.25 | 0.34   | 1.04                       | 0.78  | 1.41  |   |
| Sore throat                | -0.35  | -0.53 | -0.11  | 0.70                       | 0.59  | 0.89  | * |
| Muscle pain                | 0.26   | -0.08 | 0.49   | 1.30                       | 0.92  | 1.63  |   |
| Asthenia                   | 0.18   | -0.18 | 0.48   | 1.20                       | 0.83  | 1.61  |   |
| Anosmia/dysgeusia          | 0.50   | 0.14  | 0.87   | 1.65                       | 1.16  | 2.38  | * |
| Gastrointestinal disorders | 0.59   | 0.16  | 0.97   | 1.81                       | 1.17  | 2.63  | * |
| Conjunctivitis             | -0.18  | -0.48 | 0.17   | 0.84                       | 0.62  | 1.19  |   |
| Dyspnea                    | 0.17   | -0.10 | 0.48   | 1.19                       | 0.90  | 1.61  |   |
| Chest pain                 | 0.11   | -0.14 | 0.38   | 1.12                       | 0.87  | 1.46  |   |
| Tachycardia                | 0.26   | 0.02  | 0.60   | 1.30                       | 1.02  | 1.83  | * |
| Pneumonia                  | -0.11  | -0.48 | 0.23   | 0.90                       | 0.62  | 1.26  |   |
| Age                        | -0.13  | -0.24 | -0.001 | 0.88                       | 0.79  | 1.00  | * |
| Sex                        | -0.01  | -0.16 | 0.19   | 0.99                       | 0.85  | 1.21  |   |
| Serology days from VAX     | 0.87   | 0.65  | 1.03   | 2.39                       | 1.91  | 2.80  | * |
| Serology days before VAX   | -0.003 | -0.01 | 0.01   | 1.00                       | 0.99  | 1.01  |   |
| COVID-19                   | 1.48   | 1.07  | 1.93   | 4.39                       | 2.92  | 6.92  | * |
| * $p < 0.05$               |        |       |        |                            |       |       |   |
